# Supplementary material for: Quasispecies Fitness Partition to Characterize the Molecular Status of a Viral Population. Negative Effect of Early Ribavirin Discontinuation in a Chronically Infected HEV Patient
Source: Int J Mol Sci. 2022 Nov 24;23(23):14654. doi: 10.3390/ijms232314654 (PMC9739305; doi:10.3390/ijms232314654)
Supplement: Supplementary file 1 [file ijms-23-14654-s001.zip › Supplementary Table S1.xlsx]

## Sheet: Supplementary Table S1
Code	Pathogen	Region	Primer.FW	Primer.RV	FW.pos	RV.pos	AmplLen
gHEV	HEV	ORF2	GTCGTCTCAGCCAATGGCGAGCC	CASARAANGTCTTNGARTACTGCT	6323	6734	363
A1	HCV	NS5B	TGGTCTACTTGCTCCGAGGAGG	TTGGCCCCGAATCCATACTTG	8237	8595	312
A2	HCV	NS5B	CTTGGAGGAGGCGTGCCAGTTG	GATACTCCACCCGTTGGGC	8530	8888	318
A3	HCV	NS5B	AGCTTCCTCAGGCGGTAATGG	TCAGGTTCCGCTCGTCCTCCTC	8820	9287	423
A71	SARS-CoV-2	ORF1ab	ACAAATCCAATTCAGTTGTCTTCCTATTC	TGGAAAAGAAAGGTAAGAACAAGTCCT	21358	21743	330
A72	SARS-CoV-2	S	ACACGTGGTGTTTATTACCCTGAC	ACTCTGAACTCACTTTCCATCCAAC	21659	22038	331
A73	SARS-CoV-2	S	CAATTTTGTAATGATCCATTTTTGGGTGT	CACCAGCTGTCCAACCTGAAGA	21962	22346	334
A74	SARS-CoV-2	S	ACATCACTAGGTTTCAAACTTTACTTGC	GCAACACAGTTGCTGATTCTCTTC	22263	22650	336
A75	SARS-CoV-2	S	AGAGTCCAACCAACAGAATCTATTGT	ACCACCAACCTTAGAATCAAGATTGT	22517	22903	335
A76	SARS-CoV-2	S	GGGCAAACTGGAAAGATTGCTGA	ACCTGTGCCTGTTAAACCATTGA	22799	23212	368
A77	SARS-CoV-2	S	CCAGCAACTGTTTGTGGACCTA	CAGCCCCTATTAAACAGCCTGC	23123	23522	356
A78	SARS-CoV-2	S	CAACTTACTCCTACTTGGCGTGT	TGTGTACAAAAACTGCCATATTGCA	23444	23847	356
A79	SARS-CoV-2	S	GTGGTGATTCAACTGAATGCAGC	CATTTCATCTGTGAGCAAAGGTGG	23790	24169	333
A80	SARS-CoV-2	S	TTGCCTTGGTGATATTGCTGCT	TGGAGCTAAGTTGTTTAACAAGCG	24079	24467	343
A81	SARS-CoV-2	S	GCACTTGGAAAACTTCAAGATGTGG	GTGAAGTTCTTTTCTTGTGCAGGG	24392	24789	349
A82	SARS-CoV-2	S	GGGCTATCATCTTATGTCCTTCCCT	TGCCAGAGATGTCACCTAAATCAA	24697	25076	331
A83	SARS-CoV-2	S	TCCTTTGCAACCTGAATTAGACTCA	TTTGACTCCTTTGAGCACTGGC	24979	25369	344
A84	SARS-CoV-2	S	TGCTGTAGTTGTCTCAAGGGCT	AGGTGTGAGTAAACTGTTACAAACAAC	25280	25673	345
Table S1: Primers Forward (FW) and Reverse (RV) for hepatitis E virus (HEV), hepatitis C virus (HCV) and SARS-CoV-2. FW.pos and REV.pos are the primer positions. FW.tpos and RV.tpos are the trimming positions. AmplLen indicates the amplicon length after trimming primers
